# Supplementary material for: Serum Metabolomic Profiling in Rheumatoid Arthritis Patients With Interstitial Lung Disease: A Case–Control Study
Source: PubMed Central journal article supplement (PMC7773768; doi:10.3389/fmed.2020.599794), 2020-12-17
Supplement: Image_3.pdf [file Image_3.pdf]

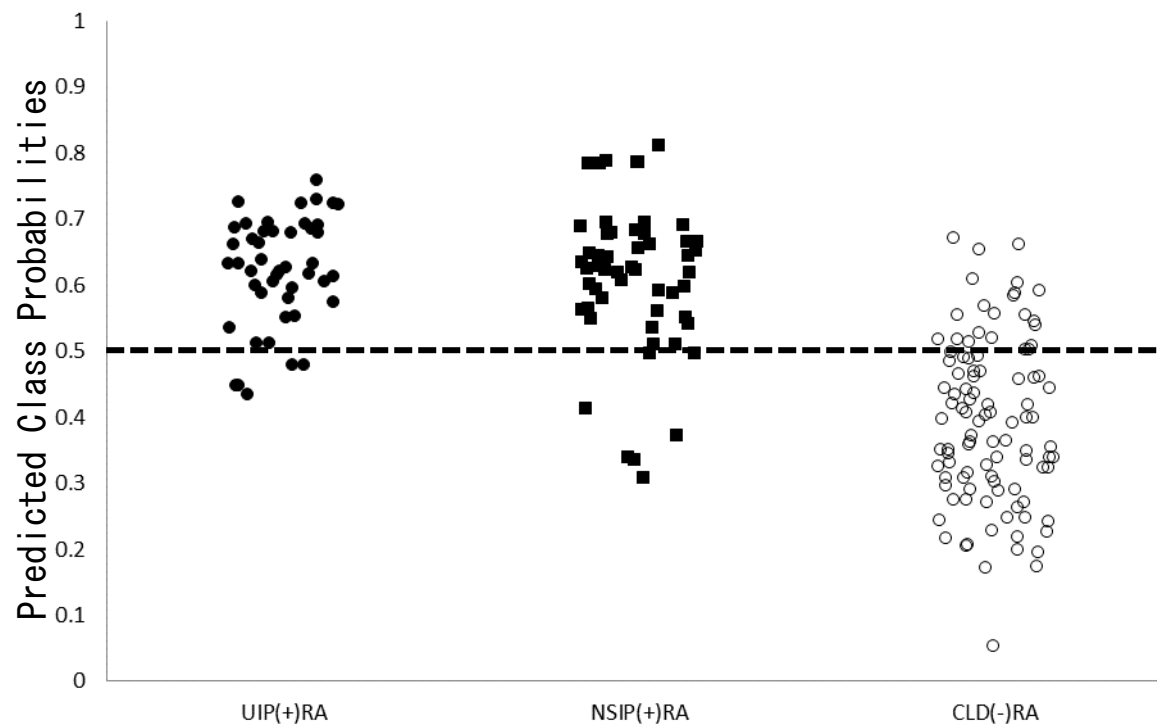

**Supplementary Figure S3. Plot of the predicted class probabilities for samples from UIP(+)**RA**, NSIP(+)**RA**, and CLD(-)**RA** using the PLS-DA model created with the three metabolites.** The cutoff value was 0.5 due to balanced subsampling. UIP(+)**RA**: rheumatoid arthritis patients with usual interstitial pneumonia, NSIP(+)**RA**: rheumatoid arthritis patients with non-specific interstitial pneumonia, CLD(-)**RA**: rheumatoid arthritis patients without chronic lung diseases, PLS-DA: partial least squares-discriminant analysis.
